# Supplementary material for: Optical properties and charge distribution in rod-shape DNA–silver cluster emitters
Source: Royal Society of Chemistry journal article supplement (doi:10.1039/c8cp03895c), 2018-01-01
Supplement: c8cp03895c1.pdf [file c8cp03895c1.pdf]

# Supporting information for: Optical properties and charge distribution in rod-shape DNA-silver clusters emitters

Martín I. Taccone,<sup>†,‡,¶</sup> Matías Berdakin,<sup>§</sup> Gustavo A. Pino,<sup>†,‡,¶</sup> and Cristián G.  
Sánchez\*,<sup>||,¶</sup>

<sup>†</sup>*Departamento de Fisicoquímica, Fac. de Ciencias Químicas, Universidad Nacional de Córdoba, Ciudad Universitaria, Pabellón Argentina, X5000HUA Córdoba, Argentina*

<sup>‡</sup>*Centro Láser de Ciencias Moleculares, Universidad Nacional de Córdoba, Ciudad Universitaria, Pabellón Argentina, X5000HUA Córdoba, Argentina*

<sup>¶</sup>*INFIQC (CONICET), Ciudad Universitaria, Pabellón Argentina, 5000 Córdoba, Argentina*

<sup>§</sup>*Departamento de Física, Facultad de Ciencias Físicas y Matemáticas, Universidad de Chile, Santiago, Chile*

<sup>||</sup>*Departamento de Química Teórica y Computacional, Facultad de Ciencias Químicas, Universidad Nacional de Córdoba, X5000HUA Córdoba, Argentina*

E-mail: cgsanchez@fcq.unc.edu.ar

Phone: +54-351-5353850 (Ext. 55020)

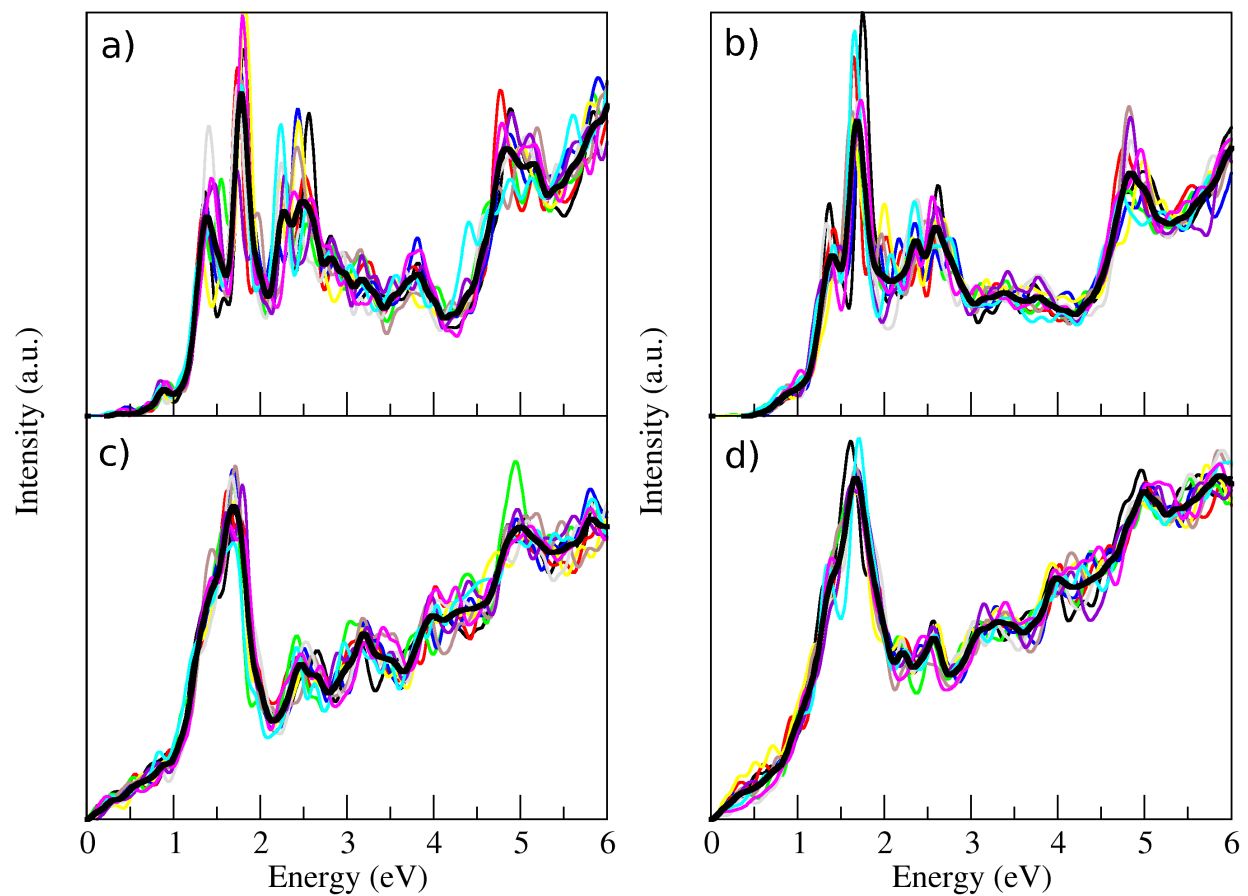

Figure S1: Manifold of spectrums obtained for neutral (upper) and charge (lower) N4 (a and c) and N6 (b and d) clusters. Black lines represent the average spectrum in all cases.

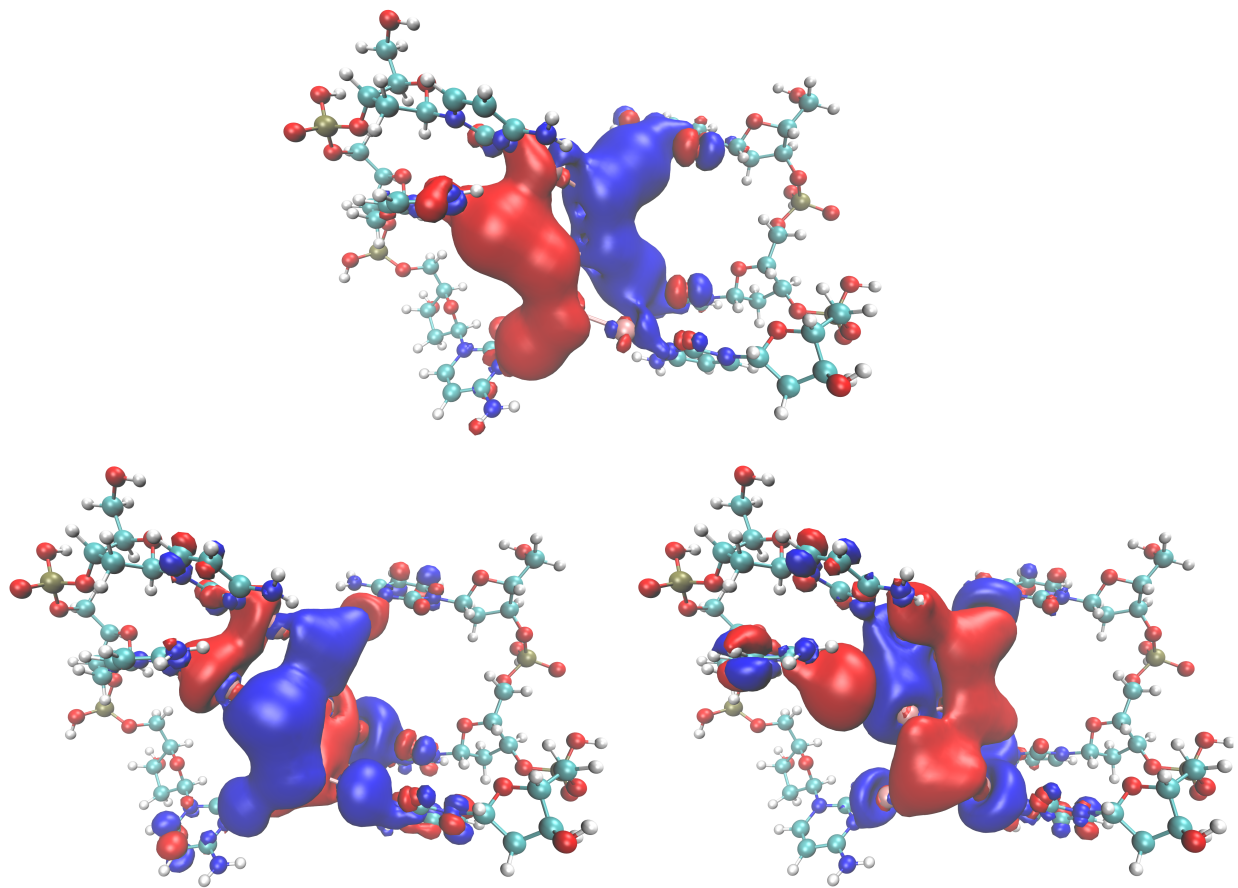

Figure S2: Depopulated (upper) and populated (lower) orbitals involved in the transversal plasmon like excitation for N4 cluster.

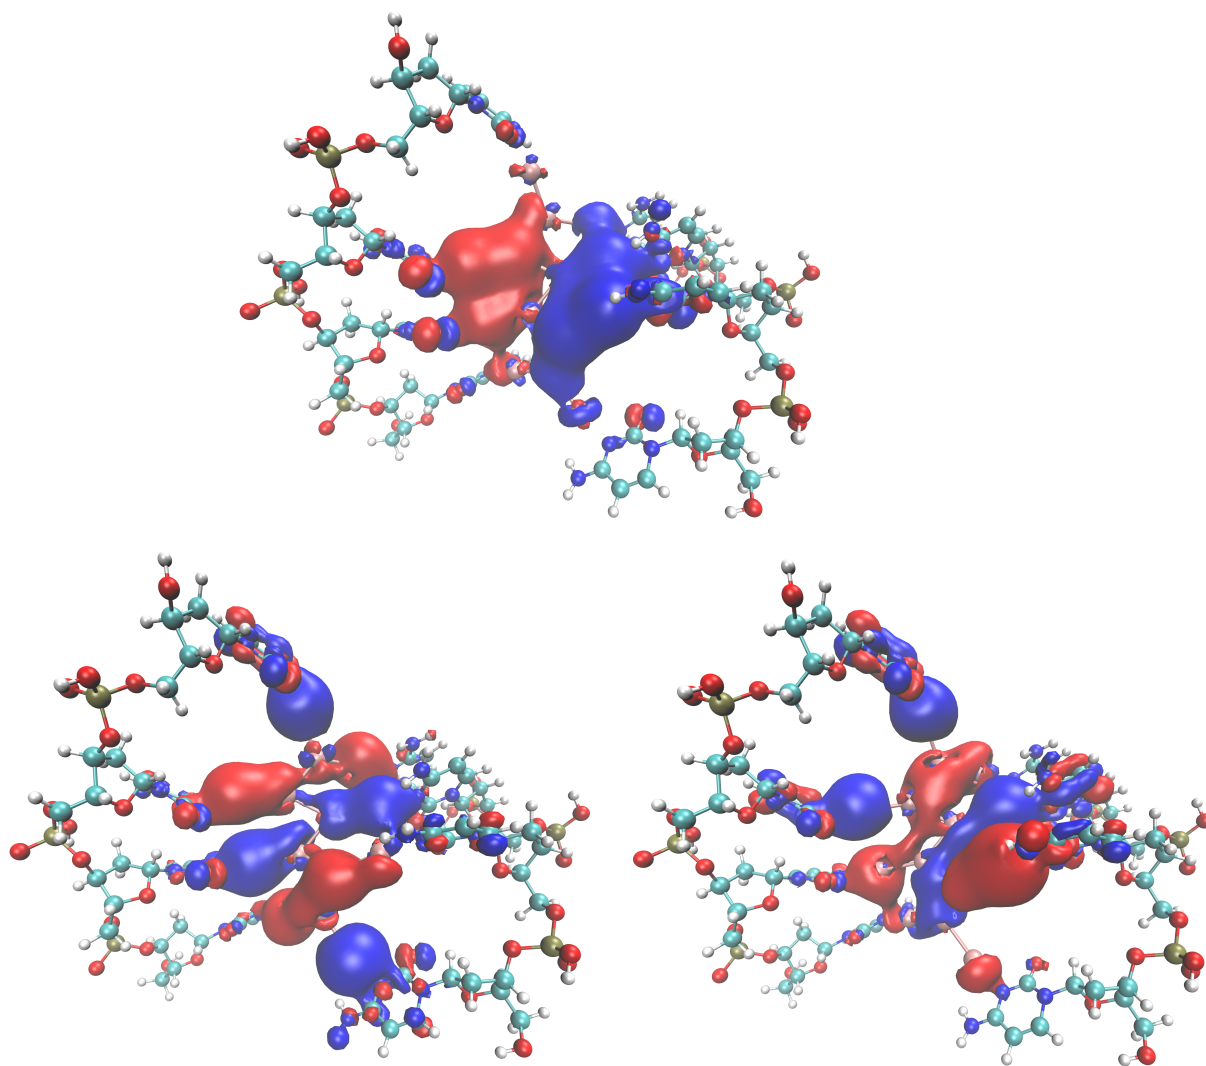

Figure S3: Depopulated (upper) and populated (lower) orbitals involved in the transversal plasmon like excitation for N6 cluster.

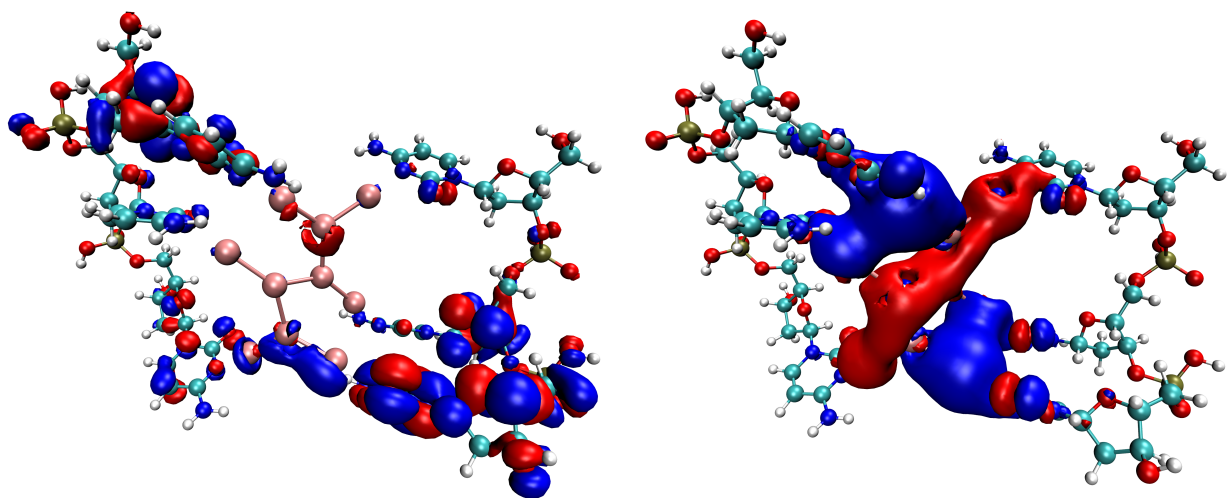

Figure S4: Depopulated (left) and populated (right) orbitals involved in the UV excitation for N4 cluster at short times.

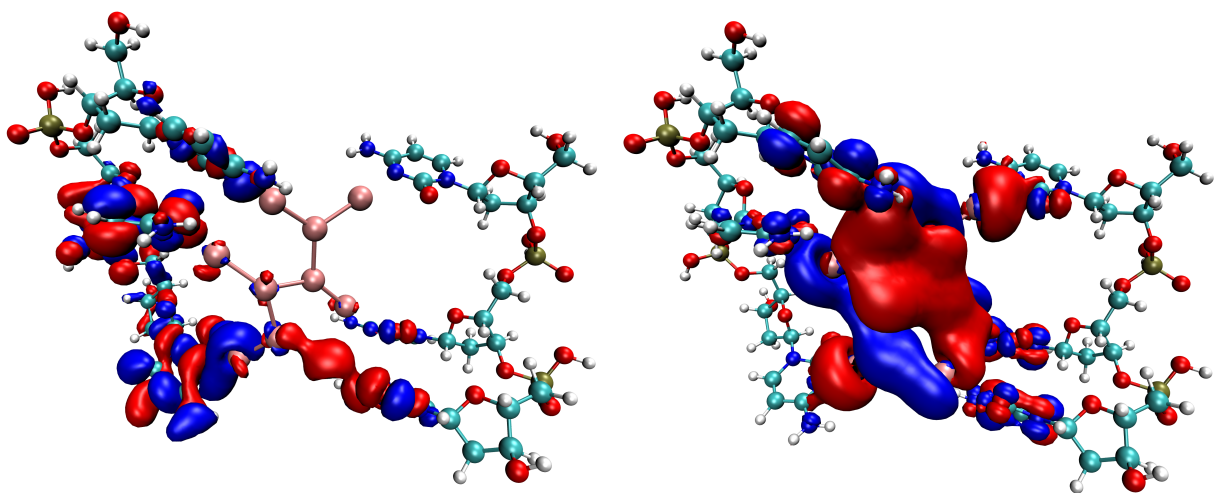

Figure S5: Depopulated (left) and populated (right) orbitals involved in the UV excitation for N4 cluster at long times.

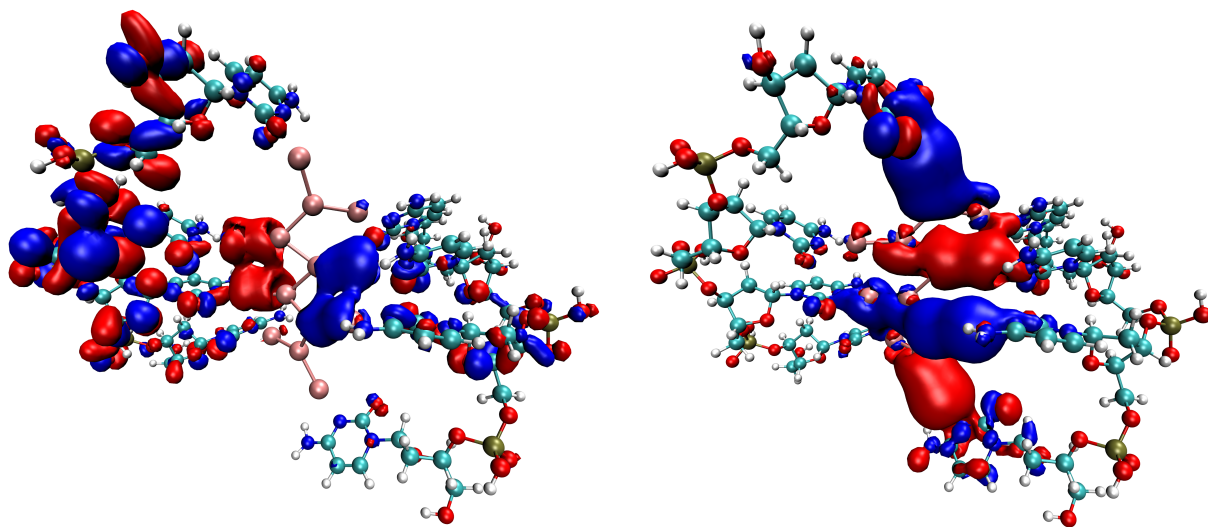

Figure S6: Depopulated (left) and populated (right) orbitals involved in the UV excitation for N6 cluster at short times.

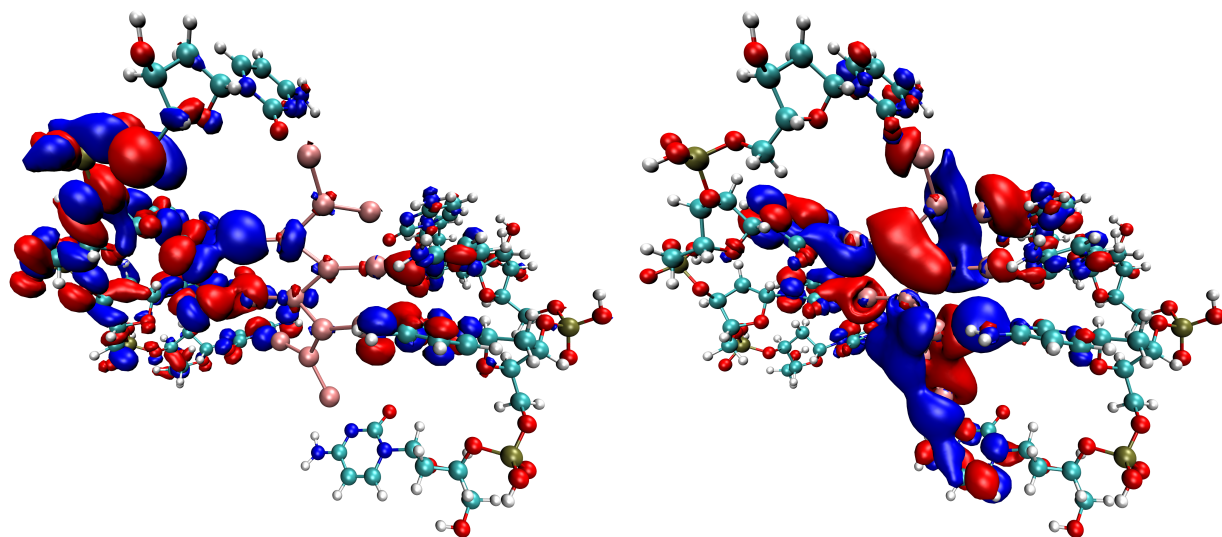

Figure S7: Depopulated (left) and populated (right) orbitals involved in the UV excitation for N6 cluster at long times.
